# Supplementary material for: Deciphering the Role of Positions 145 and 165 in Fluorescence Lifetime Shortening in the EGFP Variants
Source: MDPI journal article supplement (doi:10.3390/biom10111547), 2020-11-13
Supplement: s1 [file s1]

Supplemental information

# Deciphering the Role of Positions 145 and 165 in Fluorescence Lifetime Shortening in the EGFP Variants

Anastasia V. Mamontova <sup>1</sup>, Aleksander M. Shakhov <sup>2</sup>, Konstantin A. Lukyanov <sup>1</sup> and Alexey M. Bogdanov <sup>3,\*</sup>

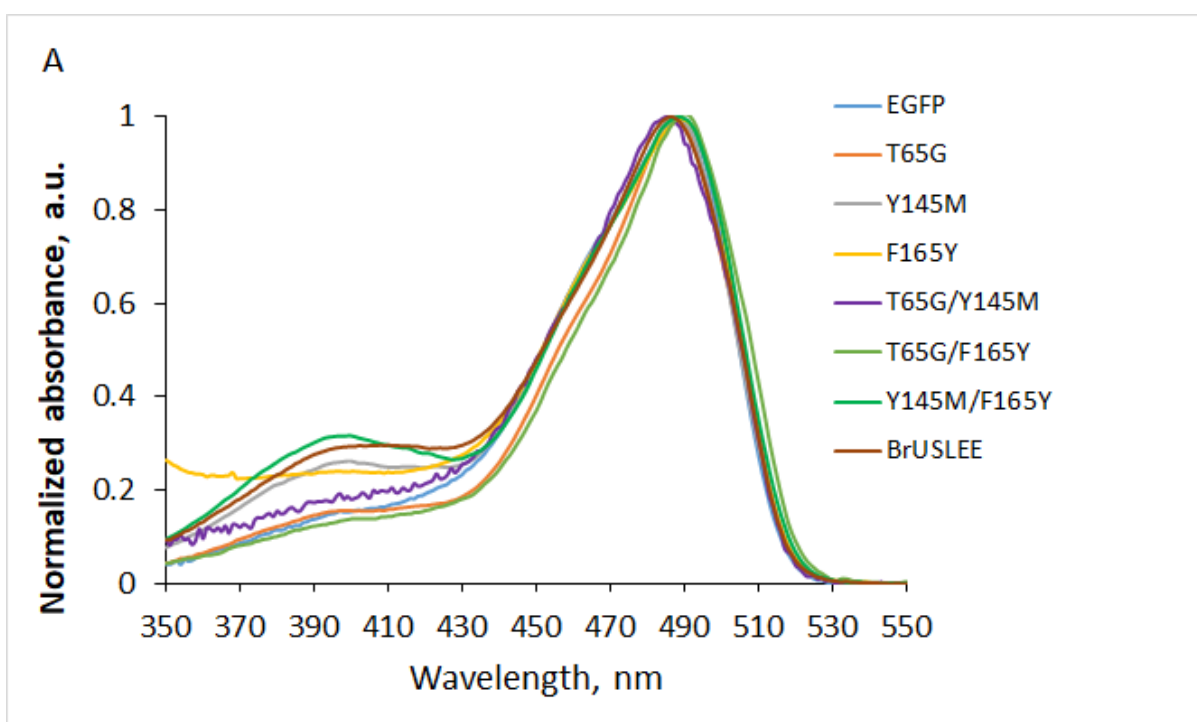

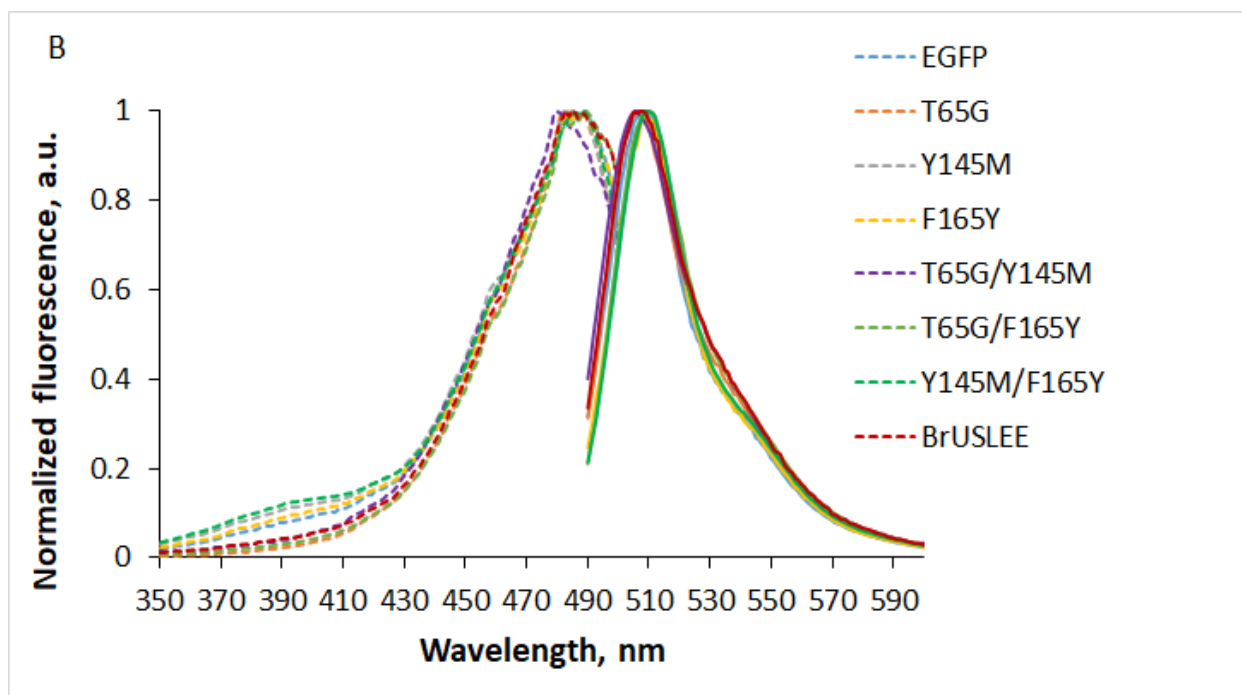

**Figure 1.** Absorption (A) and fluorescence (B) spectra of EGFP and mutants. In the fluorescence graph, dashed lines show fluorescence excitation, solid lines – fluorescence emission.

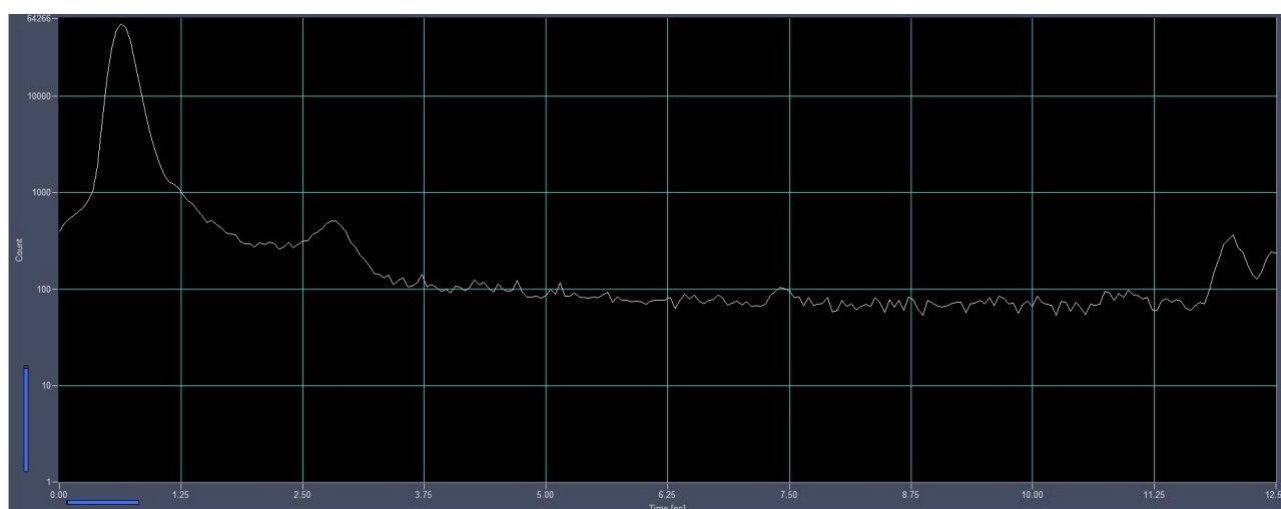

**Figure 2.** Instrument response function. IRF shape was recorded separately under the same excitation conditions (980 nm) and represented in a screenshot from Becker & Hickl SPCM v. 9.82 data acquisition software. .

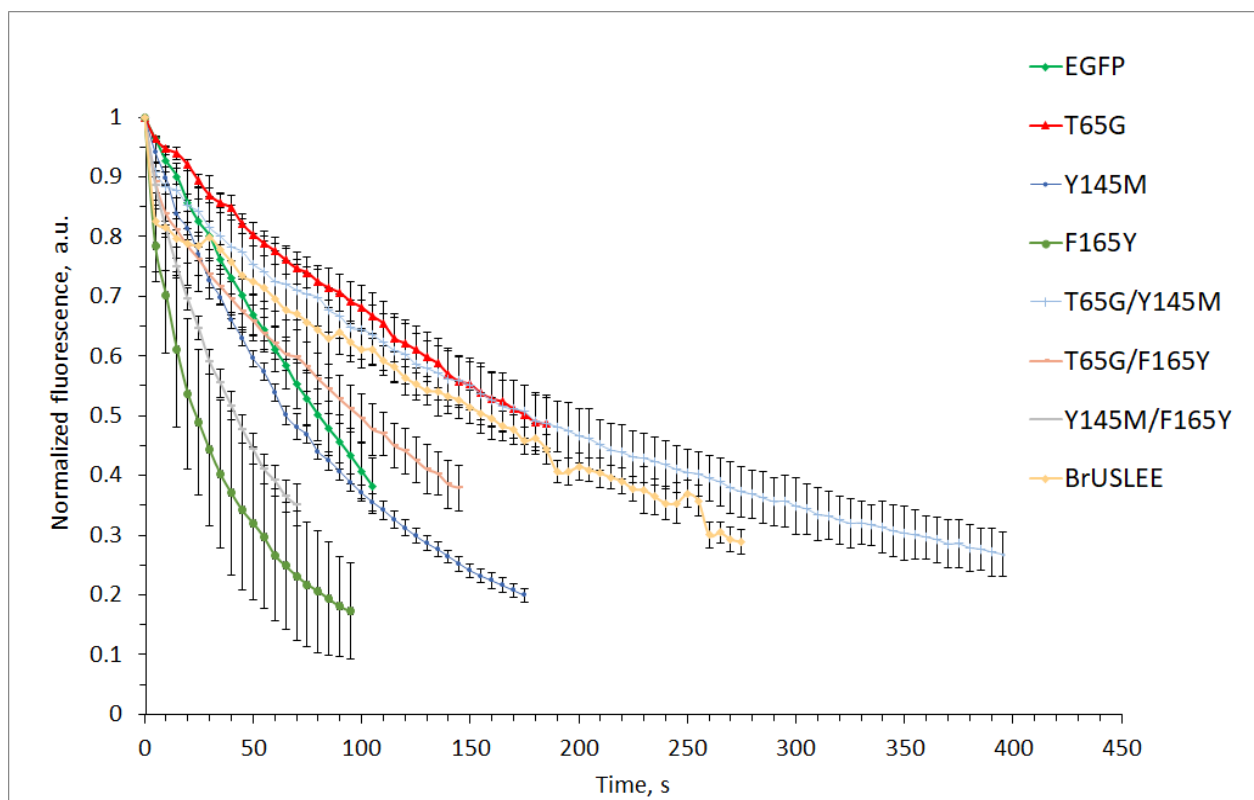

**Figure 3.** Photobleaching kinetics of the immobilized proteins, EGFP and its mutants, measured *in vitro*, in PBS. Green fluorescence intensities were background-subtracted and normalized to the maximum values. Standard deviation values ( $n = 15$ – $20$  measurements in a representative experiment out of five independent experiments) are shown.

**Table 1.** Photostability of EGFP and its mutants *in vitro*.

| Fluorescent protein        | Photobleaching, s* |
|----------------------------|--------------------|
| EGFP                       | 80±10              |
| T65G                       | 170±25             |
| Y145M                      | 51±5               |
| F165Y                      | 30±6               |
| T65G/Y145M                 | 140±15             |
| T65G/F165Y                 | 65±8               |
| Y145M/F165Y                | 24±2               |
| T65G/Y145M/F165Y (BrUSLEE) | 142±17             |

\*Photobleaching value is represented as the photobleaching half-time for each fluorescent protein, i.e., larger values correspond to the slower photobleaching rate and higher photostability.
